# Supplementary material for: Genetic Diversity and Population Structure of Fusarium oxysporum f. sp. conglutinans Race 1 in Northern China Samples
Source: MDPI journal article supplement (doi:10.3390/jof8101089), 2022-10-16
Supplement: s1 [file s1]

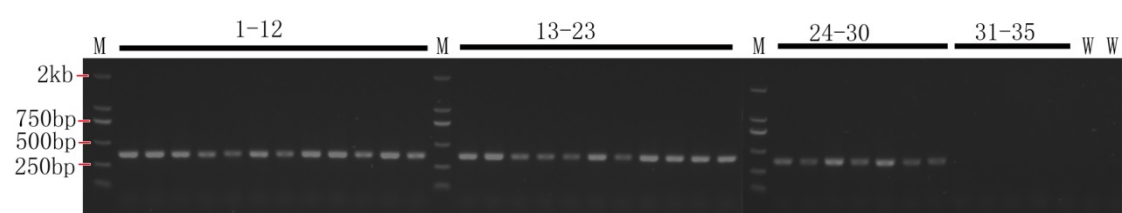

**Figure S1.** PCR identification of FOC using FOC-specific primer. M, molecular markers of D2000 DNA marker. 1-26, 26 FOC isolates corresponding to the strains listed in table 1 from 1-26. 27-28, FOC race 1(ATCC 52557). 29-30, FOC race 2(ATCC 58385). 31-35, five other FO used as control(31, Fopep. 32, Foco. 33, Focub, 34, Fowe. 35, Fol). W, negative control using PCR-grade water as the template. A 346 bp FOC-specific DNA fragment can be amplified in all FOC isolates, 52557 and 58385.

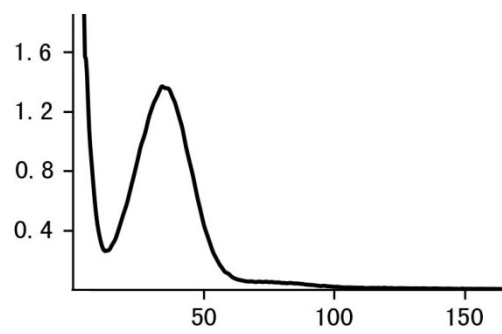

**Figure S2.** K-mer (25-mer) analysis for estimating the genome size of FoYQ-1. The X-axis is k-mer depth and the Y-axis is the proportion that represents the frequency at that depth. The peak K-mer frequency was 35.

**Table S1.** The reversions and translocations between two genomes. GCA\_014839635.1 used as reference.

| reference         | begin   | end     | query       | begin   | end     | matchlength | similarity | type          |
|-------------------|---------|---------|-------------|---------|---------|-------------|------------|---------------|
| MU089289.1        | 228903  | 531677  | tig00000079 | 925223  | 622450  | 302775      | 99.99      | reversion     |
| MU089289.1        | 4115240 | 4317690 | tig00001019 | 586344  | 788793  | 202451      | 99.99      | translocation |
| MU089288.1        | 891536  | 1024978 | tig00001021 | 196933  | 330373  | 133443      | 99.99      | translocation |
| MU089289.1        | 1990231 | 2106395 | tig00001034 | 577685  | 461504  | 116165      | 99.98      | reversion     |
| MU089289.1        | 4024955 | 4113314 | tig00001019 | 497957  | 586345  | 88360       | 99.96      | translocation |
| JABTBS010000012.1 | 3447982 | 3534870 | tig00001052 | 788515  | 701648  | 86889       | 99.79      | reversion     |
| MU089289.1        | 727954  | 813234  | tig00000079 | 316651  | 231402  | 85281       | 99.96      | reversion     |
| JABTBS010000021.1 | 30065   | 112197  | tig00000173 | 93526   | 11394   | 82133       | 99.99      | reversion     |
| MU089289.1        | 4317689 | 4399036 | tig00001019 | 791010  | 872350  | 81348       | 99.95      | translocation |
| JABTBS010000013.1 | 107005  | 187360  | tig00009036 | 1651210 | 1731561 | 80356       | 99.99      | translocation |
| MU089289.1        | 142633  | 222790  | tig00000079 | 1005382 | 925223  | 80158       | 99.93      | reversion     |
| JABTBS010000013.1 | 24357   | 88766   | tig00001103 | 177875  | 113469  | 64410       | 99.99      | reversion     |
| JABTBS010000006.1 | 2234768 | 2297768 | tig00000086 | 1841813 | 1778813 | 63001       | 99.99      | reversion     |
| MU089288.1        | 3723333 | 3785257 | tig00009038 | 61900   | 1       | 61925       | 99.88      | reversion     |
| MU089291.1        | 9328    | 64573   | tig00001065 | 19693   | 74937   | 55246       | 99.99      | translocation |
| MU089289.1        | 673786  | 727954  | tig00000079 | 415387  | 361219  | 54169       | 99.99      | reversion     |
| JABTBS010000038.1 | 65815   | 119503  | tig00001092 | 380406  | 434093  | 53689       | 99.99      | translocation |
| MU089289.1        | 615338  | 665671  | tig00000079 | 475884  | 425551  | 50334       | 99.99      | reversion     |
| MU089288.1        | 3006020 | 3056342 | tig00001078 | 28338   | 78661   | 50323       | 99.64      | translocation |
| MU089289.1        | 566437  | 610773  | tig00000079 | 520137  | 475800  | 44337       | 99.96      | reversion     |
| JABTBS010000015.1 | 3019473 | 3060226 | tig00001083 | 869517  | 828764  | 40754       | 99.99      | reversion     |
| JABTBS010000014.1 | 315378  | 355675  | tig00001068 | 11233   | 51531   | 40298       | 99.78      | translocation |
| MU089289.1        | 3158008 | 3196972 | tig00001027 | 1       | 38961   | 38965       | 99.89      | translocation |
| JABTBS010000043.1 | 62309   | 99996   | tig00000441 | 3       | 37686   | 37688       | 99.97      | translocation |
| JABTBS010000012.1 | 3411423 | 3446054 | tig00001052 | 823173  | 788516  | 34632       | 99.92      | reversion     |
| MU089288.1        | 3662923 | 3694828 | tig00009038 | 125556  | 93665   | 31906       | 99.96      | reversion     |
| JABTBS010000006.1 | 2201997 | 2232842 | tig00000086 | 1872657 | 1841812 | 30846       | 100        | reversion     |
| JABTBS010000014.1 | 2553167 | 2583622 | tig00001040 | 34660   | 4175    | 30456       | 99.89      | reversion     |
| JABTBS010000014.1 | 2585724 | 2616179 | tig00001040 | 34660   | 4175    | 30456       | 99.89      | reversion     |
| JABTBS010000043.1 | 1       | 29820   | tig00000441 | 37729   | 67553   | 29820       | 99.98      | translocation |
| MU089289.1        | 820011  | 848756  | tig00000079 | 221419  | 192676  | 28746       | 99.99      | reversion     |
| MU089289.1        | 4880315 | 4908757 | tig00001019 | 1       | 28446   | 28443       | 99.89      | translocation |
| MU089288.1        | 3655422 | 3683178 | tig00009038 | 133058  | 105315  | 27757       | 99.94      | reversion     |
| MU089288.1        | 3696757 | 3723337 | tig00009038 | 93666   | 67086   | 26581       | 100        | reversion     |
| MU089289.1        | 3145431 | 3171669 | tig00001023 | 806043  | 832293  | 26239       | 99.46      | translocation |
| MU089288.1        | 2948577 | 2974194 | tig00001078 | 3795    | 29437   | 25618       | 99.89      | translocation |
| JABTBS010000026.1 | 47775   | 72860   | tig00001049 | 307668  | 332752  | 25086       | 99.92      | translocation |
| MU089290.1        | 8283    | 32742   | tig00001049 | 234799  | 210340  | 24460       | 99.98      | reversion     |
| JABTBS010000017.1 | 178001  | 201886  | tig00000411 | 23902   | 1       | 23886       | 99.74      | reversion     |
| JABTBS010000012.1 | 3578798 | 3602631 | tig00001046 | 230135  | 253968  | 23834       | 100        | translocation |

|                   |         |         |             |         |         |       |       |               |
|-------------------|---------|---------|-------------|---------|---------|-------|-------|---------------|
| MU089290.1        | 102406  | 125600  | tig00001049 | 185216  | 208411  | 23195 | 99.97 | translocation |
| MU089288.1        | 2993265 | 3016045 | tig00001078 | 168072  | 145291  | 22781 | 99.98 | reversion     |
| JABTBS010000012.1 | 3485181 | 3507479 | tig00000052 | 1       | 22292   | 22299 | 99.97 | translocation |
| JABTBS010000014.1 | 4883    | 26687   | tig00001069 | 339     | 22090   | 21805 | 99.75 | translocation |
| JABTBS010000012.1 | 3409686 | 3431395 | tig00001052 | 824910  | 803175  | 21710 | 99.88 | reversion     |
| MU089294.1        | 80983   | 102652  | tig00009033 | 21639   | 1       | 21670 | 99.84 | reversion     |
| MU089293.1        | 3470    | 25136   | tig00009033 | 1       | 21639   | 21667 | 99.85 | translocation |
| MU089293.1        | 157172  | 178838  | tig00009033 | 21639   | 1       | 21667 | 99.85 | reversion     |
| JABTBS010000050.1 | 5377    | 27043   | tig00009033 | 1       | 21639   | 21667 | 99.85 | translocation |
| JABTBS010000050.1 | 44672   | 66337   | tig00009033 | 1       | 21639   | 21666 | 99.85 | translocation |
| MU089294.1        | 2387    | 24044   | tig00009033 | 21639   | 1       | 21658 | 99.81 | reversion     |
| MU089294.1        | 96726   | 118373  | tig00009033 | 21615   | 1       | 21648 | 99.83 | reversion     |
| MU089293.1        | 117902  | 139544  | tig00009033 | 21639   | 1       | 21643 | 99.6  | reversion     |
| MU089294.1        | 33839   | 55481   | tig00009033 | 21615   | 1       | 21643 | 99.84 | reversion     |
| MU089293.1        | 125762  | 147403  | tig00009033 | 21615   | 1       | 21642 | 99.86 | reversion     |
| MU089293.1        | 133621  | 155262  | tig00009033 | 21615   | 1       | 21642 | 99.86 | reversion     |
| MU089293.1        | 165056  | 186697  | tig00009033 | 21615   | 1       | 21642 | 99.86 | reversion     |
| MU089294.1        | 10262   | 31903   | tig00009033 | 21615   | 1       | 21642 | 99.86 | reversion     |
| MU089294.1        | 41699   | 63340   | tig00009033 | 21615   | 1       | 21642 | 99.86 | reversion     |
| JABTBS010000051.1 | 7999    | 29640   | tig00009033 | 21615   | 1       | 21642 | 99.82 | reversion     |
| JABTBS010000051.1 | 15858   | 37499   | tig00009033 | 21615   | 1       | 21642 | 99.86 | reversion     |
| JABTBS010000056.1 | 1622    | 23249   | tig00009033 | 1       | 21639   | 21628 | 99.64 | translocation |
| JABTBS010000050.1 | 52530   | 73967   | tig00009033 | 1       | 21453   | 21438 | 99.92 | translocation |
| MU089294.1        | 104563  | 125835  | tig00009033 | 21639   | 398     | 21273 | 99.84 | reversion     |
| MU089289.1        | 540237  | 561089  | tig00000079 | 540947  | 520137  | 20853 | 99.8  | reversion     |
| JABTBS010000051.1 | 104     | 20847   | tig00009033 | 21639   | 935     | 20744 | 99.67 | reversion     |
| MU089294.1        | 25955   | 46519   | tig00009033 | 21639   | 1104    | 20565 | 99.83 | reversion     |
| JABTBS010000014.1 | 176726  | 196947  | tig00001070 | 157475  | 177696  | 20222 | 100   | translocation |
| JABTBS010000014.1 | 558681  | 578695  | tig00001038 | 205772  | 225786  | 20015 | 99.88 | translocation |
| JABTBS010000047.1 | 8882    | 28694   | tig00001049 | 267869  | 287678  | 19813 | 99.67 | translocation |
| JABTBS010000012.1 | 976503  | 996214  | tig00000174 | 80120   | 99831   | 19712 | 99.99 | translocation |
| JABTBS010000014.1 | 177303  | 196947  | tig00000162 | 1       | 19651   | 19645 | 99.96 | translocation |
| JABTBS010000014.1 | 1192063 | 1211700 | tig00001040 | 1337116 | 1356753 | 19638 | 99.99 | translocation |
| JABTBS010000056.1 | 11815   | 31108   | tig00009033 | 2376    | 21639   | 19294 | 99.81 | translocation |
| JABTBS010000050.1 | 1       | 19184   | tig00009033 | 2484    | 21639   | 19184 | 99.83 | translocation |
| JABTBS010000051.1 | 3927    | 23048   | tig00001112 | 4529    | 23688   | 19122 | 99.03 | translocation |
| MU089294.1        | 92661   | 111781  | tig00001112 | 4529    | 23688   | 19121 | 99.17 | translocation |
| MU089294.1        | 84802   | 103919  | tig00001112 | 4529    | 23688   | 19118 | 99.18 | translocation |
| JABTBS010000051.1 | 43229   | 62346   | tig00001112 | 4529    | 23688   | 19118 | 99.18 | translocation |
| MU089294.1        | 21915   | 41030   | tig00001112 | 4529    | 23688   | 19116 | 99.18 | translocation |
| MU089294.1        | 29774   | 48889   | tig00001112 | 4529    | 23688   | 19116 | 99.18 | translocation |
| JABTBS010000051.1 | 35370   | 54485   | tig00001112 | 4529    | 23688   | 19116 | 99.19 | translocation |
| MU089293.1        | 2203    | 21317   | tig00001112 | 23688   | 4529    | 19115 | 99.2  | reversion     |
| MU089293.1        | 10062   | 29176   | tig00001112 | 23688   | 4529    | 19115 | 99.2  | reversion     |

|                   |         |         |             |         |         |       |       |               |
|-------------------|---------|---------|-------------|---------|---------|-------|-------|---------------|
| MU089293.1        | 17921   | 37035   | tig00001112 | 23688   | 4529    | 19115 | 99.2  | reversion     |
| MU089293.1        | 25780   | 44894   | tig00001112 | 23688   | 4529    | 19115 | 99.2  | reversion     |
| MU089293.1        | 33639   | 52753   | tig00001112 | 23688   | 4529    | 19115 | 99.2  | reversion     |
| MU089293.1        | 41498   | 60612   | tig00001112 | 23688   | 4529    | 19115 | 99.2  | reversion     |
| MU089293.1        | 49357   | 68471   | tig00001112 | 23688   | 4529    | 19115 | 99.2  | reversion     |
| MU089293.1        | 57216   | 76330   | tig00001112 | 23688   | 4529    | 19115 | 99.2  | reversion     |
| MU089293.1        | 65075   | 84189   | tig00001112 | 23688   | 4529    | 19115 | 99.2  | reversion     |
| MU089293.1        | 72934   | 92048   | tig00001112 | 23688   | 4529    | 19115 | 99.2  | reversion     |
| MU089293.1        | 80793   | 99907   | tig00001112 | 23688   | 4529    | 19115 | 99.2  | reversion     |
| MU089293.1        | 88652   | 107766  | tig00001112 | 23688   | 4529    | 19115 | 99.2  | reversion     |
| MU089293.1        | 121697  | 140811  | tig00001112 | 4529    | 23688   | 19115 | 99.19 | translocation |
| MU089293.1        | 129556  | 148670  | tig00001112 | 4529    | 23688   | 19115 | 99.2  | translocation |
| MU089293.1        | 168850  | 187964  | tig00001112 | 4529    | 23688   | 19115 | 99.2  | translocation |
| MU089294.1        | 6197    | 25311   | tig00001112 | 4529    | 23688   | 19115 | 99.2  | translocation |
| MU089294.1        | 14056   | 33170   | tig00001112 | 4529    | 23688   | 19115 | 99.2  | translocation |
| MU089294.1        | 37634   | 56748   | tig00001112 | 4529    | 23688   | 19115 | 99.2  | translocation |
| MU089294.1        | 45493   | 64607   | tig00001112 | 4529    | 23688   | 19115 | 99.2  | translocation |
| MU089294.1        | 53352   | 72466   | tig00001112 | 4529    | 23688   | 19115 | 99.2  | translocation |
| JABTBS010000051.1 | 11793   | 30907   | tig00001112 | 4529    | 23688   | 19115 | 99.2  | translocation |
| JABTBS010000051.1 | 19652   | 38766   | tig00001112 | 4529    | 23688   | 19115 | 99.2  | translocation |
| JABTBS010000050.1 | 4110    | 23224   | tig00001112 | 23688   | 4529    | 19115 | 99.2  | reversion     |
| JABTBS010000050.1 | 11969   | 31083   | tig00001112 | 23688   | 4529    | 19115 | 99.2  | reversion     |
| JABTBS010000050.1 | 27687   | 46801   | tig00001112 | 23688   | 4529    | 19115 | 99.2  | reversion     |
| JABTBS010000050.1 | 51263   | 70377   | tig00001112 | 23688   | 4529    | 19115 | 99.2  | reversion     |
| JABTBS010000056.1 | 23893   | 43007   | tig00001112 | 23688   | 4529    | 19115 | 99.2  | reversion     |
| MU089293.1        | 137415  | 156528  | tig00001112 | 4529    | 23688   | 19114 | 99.19 | translocation |
| MU089293.1        | 153133  | 172246  | tig00001112 | 4529    | 23688   | 19114 | 99.19 | translocation |
| JABTBS010000050.1 | 43405   | 62518   | tig00001112 | 23688   | 4529    | 19114 | 99.19 | reversion     |
| JABTBS010000056.1 | 356     | 19430   | tig00001112 | 23688   | 4529    | 19075 | 98.95 | reversion     |
| MU089289.1        | 848751  | 867645  | tig00000079 | 192189  | 173301  | 18895 | 99.9  | reversion     |
| JABTBS010000021.1 | 22066   | 40887   | tig00001087 | 1017400 | 1036210 | 18822 | 97.08 | translocation |
| MU089289.1        | 531678  | 550417  | tig00000079 | 549505  | 530767  | 18740 | 99.99 | reversion     |
| MU089294.1        | 77490   | 96057   | tig00001112 | 5061    | 23688   | 18568 | 98.94 | translocation |
| JABTBS010000015.1 | 2940207 | 2958553 | tig00001083 | 757296  | 738950  | 18347 | 99.99 | reversion     |
| MU089293.1        | 96511   | 114736  | tig00001112 | 23688   | 5416    | 18226 | 99.15 | reversion     |
| JABTBS010000017.1 | 160055  | 178003  | tig00000411 | 43700   | 25762   | 17949 | 99.94 | reversion     |
| JABTBS010000014.1 | 338196  | 355656  | tig00001068 | 34051   | 51532   | 17461 | 99.88 | translocation |
| JABTBS010000011.1 | 1       | 17457   | tig00009033 | 4210    | 21639   | 17457 | 99.81 | translocation |
| MU089294.1        | 108382  | 125835  | tig00001112 | 4529    | 22001   | 17454 | 99.42 | translocation |
| MU089294.1        | 1       | 17452   | tig00001112 | 6184    | 23688   | 17452 | 99.08 | translocation |
| JABTBS010000051.1 | 43686   | 61078   | tig00009033 | 17391   | 1       | 17393 | 99.99 | reversion     |
| JABTBS010000012.1 | 3512883 | 3530242 | tig00000052 | 22292   | 39617   | 17360 | 99.75 | translocation |
| MU089294.1        | 77490   | 94790   | tig00009033 | 17317   | 1       | 17301 | 99.73 | reversion     |
| MU089293.1        | 1       | 17277   | tig00009033 | 4387    | 21639   | 17277 | 99.79 | translocation |

|                   |         |         |             |         |         |       |       |               |
|-------------------|---------|---------|-------------|---------|---------|-------|-------|---------------|
| MU089293.1        | 153864  | 170979  | tig00009033 | 17117   | 1       | 17116 | 99.99 | reversion     |
| JABTBS010000012.1 | 2688358 | 2705313 | tig00009047 | 1       | 16956   | 16956 | 100   | translocation |
| JABTBS010000018.1 | 1438166 | 1454875 | tig00000260 | 148500  | 131810  | 16710 | 99.03 | reversion     |
| JABTBS010000018.1 | 683522  | 700213  | tig00000270 | 613154  | 629863  | 16692 | 98.98 | translocation |
| JABTBS010000023.1 | 97716   | 114146  | tig00000322 | 155249  | 138798  | 16431 | 99.59 | reversion     |
| JABTBS010000026.1 | 200570  | 216706  | tig00001049 | 18027   | 34163   | 16137 | 99.99 | translocation |
| JABTBS010000026.1 | 184450  | 200573  | tig00001049 | 1       | 16101   | 16124 | 99.86 | translocation |
| JABTBS010000018.1 | 16032   | 32056   | tig00000260 | 745538  | 761562  | 16025 | 100   | translocation |
| JABTBS010000014.1 | 6466    | 22350   | tig00001068 | 154739  | 170619  | 15885 | 99.91 | translocation |
| JABTBS010000059.1 | 3159    | 18981   | tig00009033 | 21639   | 5845    | 15823 | 99.75 | reversion     |
| MU089294.1        | 1       | 15779   | tig00009033 | 16194   | 407     | 15779 | 99.94 | reversion     |
| JABTBS010000026.1 | 182490  | 198231  | tig00001071 | 15739   | 1       | 15742 | 99.97 | reversion     |
| MU089293.1        | 117216  | 132952  | tig00001112 | 7883    | 23688   | 15737 | 98.58 | translocation |
| JABTBS010000006.1 | 198914  | 214586  | tig00001101 | 19813   | 4121    | 15673 | 99.83 | reversion     |
| JABTBS010000012.1 | 3343329 | 3358982 | tig00000071 | 15678   | 1       | 15654 | 99.04 | reversion     |
| JABTBS010000056.1 | 11815   | 27289   | tig00001112 | 20012   | 4529    | 15475 | 99.55 | reversion     |
| JABTBS010000017.1 | 95706   | 111165  | tig00000423 | 145654  | 130223  | 15460 | 99.62 | reversion     |
| JABTBS010000056.1 | 1       | 15390   | tig00009033 | 6238    | 21639   | 15390 | 99.48 | translocation |
| JABTBS010000014.1 | 691627  | 707008  | tig00001038 | 90999   | 75588   | 15382 | 99.79 | reversion     |
| JABTBS010000006.1 | 199229  | 214586  | tig00000381 | 218711  | 203334  | 15358 | 99.87 | reversion     |
| JABTBS010000050.1 | 8       | 15365   | tig00001112 | 19892   | 4529    | 15358 | 99.6  | reversion     |
| MU089289.1        | 4388910 | 4404265 | tig00001019 | 862231  | 877639  | 15356 | 99.66 | translocation |
| MU089288.1        | 2429000 | 2444350 | tig00001062 | 268994  | 253654  | 15351 | 99.93 | reversion     |
| JABTBS010000017.1 | 141263  | 156578  | tig00000423 | 135601  | 120286  | 15316 | 100   | reversion     |
| MU089289.1        | 2396793 | 2412084 | tig00000270 | 18953   | 3700    | 15292 | 94.66 | reversion     |
| JABTBS010000018.1 | 864547  | 879800  | tig00001034 | 880746  | 865455  | 15254 | 94.65 | reversion     |
| JABTBS010000051.1 | 1       | 15189   | tig00001112 | 8469    | 23688   | 15189 | 98.73 | translocation |
| MU089289.1        | 1506279 | 1521421 | tig00001019 | 1362447 | 1377592 | 15143 | 96.09 | translocation |
| MU089290.1        | 180455  | 195565  | tig00000240 | 75371   | 60261   | 15111 | 100   | reversion     |
| JABTBS010000015.1 | 2018541 | 2033547 | tig00001058 | 1       | 14932   | 15007 | 98.18 | translocation |
| JABTBS010000015.1 | 1909335 | 1924057 | tig00001087 | 231274  | 216500  | 14723 | 94.74 | reversion     |
| MU089293.1        | 117216  | 131685  | tig00009033 | 14495   | 1       | 14470 | 99.5  | reversion     |
| MU089291.1        | 64416   | 78884   | tig00001065 | 75111   | 89572   | 14469 | 99.59 | translocation |
| MU089291.1        | 190144  | 204612  | tig00001065 | 89572   | 75111   | 14469 | 99.59 | reversion     |
| JABTBS010000015.1 | 720391  | 734767  | tig00001082 | 1       | 14409   | 14377 | 98.23 | translocation |
| JABTBS010000013.1 | 88765   | 103015  | tig00001103 | 111540  | 97301   | 14251 | 99.91 | reversion     |
| MU089289.1        | 1990224 | 2004462 | tig00001034 | 577692  | 563438  | 14239 | 99.89 | reversion     |
| JABTBS010000015.1 | 2018541 | 2032755 | tig00001057 | 1114630 | 1128780 | 14215 | 98.09 | translocation |
| MU089293.1        | 176709  | 190734  | tig00001112 | 4529    | 18551   | 14026 | 99.89 | translocation |
| JABTBS010000015.1 | 719815  | 733803  | tig00001081 | 176428  | 190468  | 13989 | 98.02 | translocation |
| JABTBS010000012.1 | 2710054 | 2723993 | tig00001052 | 78994   | 65073   | 13940 | 96.68 | reversion     |
| JABTBS010000051.1 | 1       | 13922   | tig00009033 | 13909   | 1       | 13922 | 99.71 | reversion     |
| JABTBS010000006.1 | 4344    | 18156   | tig00001106 | 1       | 13763   | 13813 | 98.22 | translocation |
| JABTBS010000042.1 | 4368    | 18177   | tig00001106 | 1       | 13760   | 13810 | 98.22 | translocation |

|                   |         |         |             |         |         |       |       |               |
|-------------------|---------|---------|-------------|---------|---------|-------|-------|---------------|
| JABTBS010000045.1 | 16567   | 30376   | tig00001106 | 1       | 13760   | 13810 | 98.22 | translocation |
| JABTBS010000041.1 | 93455   | 107264  | tig00001106 | 13760   | 1       | 13810 | 98.2  | reversion     |
| MU089286.1        | 3227770 | 3241578 | tig00001106 | 13760   | 1       | 13809 | 98.2  | reversion     |
| JABTBS010000055.1 | 5658    | 19466   | tig00001106 | 1       | 13760   | 13809 | 98.22 | translocation |
| MU089289.1        | 5015565 | 5029373 | tig00001106 | 13760   | 1       | 13809 | 98.2  | reversion     |
| JABTBS010000041.1 | 76022   | 89830   | tig00001106 | 13760   | 1       | 13809 | 98.19 | reversion     |
| JABTBS010000032.1 | 89805   | 103613  | tig00001106 | 13760   | 1       | 13809 | 98.19 | reversion     |
| JABTBS010000011.1 | 10243   | 24049   | tig00001112 | 23688   | 9837    | 13807 | 98.89 | reversion     |
| JABTBS010000045.1 | 47808   | 61542   | tig00001106 | 75      | 13760   | 13735 | 98.22 | translocation |
| JABTBS010000045.1 | 61540   | 75273   | tig00001106 | 75      | 13759   | 13734 | 98.22 | translocation |
| JABTBS010000015.1 | 700727  | 714411  | tig00001081 | 162748  | 176428  | 13685 | 98.32 | translocation |
| JABTBS010000015.1 | 2004861 | 2018541 | tig00001057 | 1095543 | 1109226 | 13681 | 98.39 | translocation |
| JABTBS010000011.1 | 1       | 13638   | tig00001112 | 18163   | 4529    | 13638 | 99.93 | reversion     |
| MU089291.1        | 65366   | 78885   | tig00001066 | 1       | 13507   | 13520 | 99.54 | translocation |
| MU089289.1        | 164675  | 178181  | tig00000079 | 1273743 | 1260237 | 13507 | 99.62 | reversion     |
| MU089289.1        | 1135319 | 1148825 | tig00000079 | 969834  | 983340  | 13507 | 99.62 | translocation |
| MU089289.1        | 38456   | 51947   | tig00001078 | 295120  | 281563  | 13492 | 99.51 | reversion     |
| MU089293.1        | 1       | 13458   | tig00001112 | 17986   | 4529    | 13458 | 99.93 | reversion     |
| JABTBS010000015.1 | 1619159 | 1632556 | tig00000083 | 15969   | 29360   | 13398 | 99.96 | translocation |
| JABTBS010000018.1 | 1424778 | 1438170 | tig00000260 | 162102  | 148707  | 13393 | 98.45 | reversion     |
| JABTBS010000018.1 | 669923  | 683315  | tig00000270 | 599765  | 613158  | 13393 | 98.53 | translocation |
| JABTBS010000012.1 | 3146426 | 3159783 | tig00001052 | 518928  | 505571  | 13358 | 100   | reversion     |
| JABTBS010000014.1 | 176726  | 189998  | tig00000174 | 13268   | 1       | 13273 | 99.92 | reversion     |
| MU089292.1        | 26975   | 40156   | tig00000161 | 2785    | 15929   | 13182 | 99.53 | translocation |
| MU089287.1        | 402020  | 415197  | tig00000161 | 15929   | 2785    | 13178 | 99.51 | reversion     |
| MU089289.1        | 2833611 | 2846709 | tig00000270 | 216160  | 229210  | 13099 | 95.61 | translocation |
| JABTBS010000050.1 | 60945   | 73990   | tig00009033 | 557     | 13616   | 13046 | 99.85 | translocation |
| JABTBS010000050.1 | 60962   | 73990   | tig00001112 | 21821   | 8762    | 13029 | 99.14 | reversion     |
| JABTBS010000045.1 | 1       | 12943   | tig00001106 | 869     | 13760   | 12943 | 98.13 | translocation |
| MU089292.1        | 33101   | 46026   | tig00000319 | 211388  | 198464  | 12926 | 99.98 | reversion     |
| MU089287.1        | 396150  | 409074  | tig00000319 | 198464  | 211388  | 12925 | 99.98 | translocation |
| JABTBS010000039.1 | 42508   | 55328   | tig00000319 | 211284  | 198464  | 12821 | 99.98 | reversion     |
| MU089289.1        | 2902080 | 2914846 | tig00001034 | 822675  | 835426  | 12767 | 96.34 | translocation |
| MU089289.1        | 2354013 | 2366763 | tig00001025 | 64901   | 52134   | 12751 | 96.32 | reversion     |
| JABTBS010000041.1 | 25598   | 38317   | tig00001106 | 12670   | 1       | 12720 | 98.06 | reversion     |
| MU089292.1        | 33481   | 46027   | tig00000418 | 3       | 12562   | 12547 | 99.73 | translocation |
| JABTBS010000039.1 | 22309   | 34855   | tig00000418 | 3       | 12562   | 12547 | 99.73 | translocation |
| MU089287.1        | 396149  | 408694  | tig00000418 | 12562   | 3       | 12546 | 99.72 | reversion     |
| JABTBS010000041.1 | 41934   | 54434   | tig00001106 | 13760   | 1321    | 12501 | 98.12 | reversion     |
| JABTBS010000012.1 | 358597  | 371074  | tig00000174 | 688449  | 700926  | 12478 | 100   | translocation |
| MU089289.1        | 2253297 | 2265707 | tig00001025 | 167019  | 154635  | 12411 | 94.61 | reversion     |
| MU089289.1        | 2800026 | 2812411 | tig00001034 | 721959  | 734369  | 12386 | 94.61 | translocation |
| MU089290.1        | 1393885 | 1406028 | tig00001049 | 272236  | 284379  | 12144 | 100   | translocation |
| JABTBS010000026.1 | 13868   | 26011   | tig00001049 | 272236  | 284379  | 12144 | 100   | translocation |

|                   |         |         |             |         |         |       |       |               |
|-------------------|---------|---------|-------------|---------|---------|-------|-------|---------------|
| JABTBS010000059.1 | 6976    | 18981   | tig00001112 | 4529    | 16532   | 12006 | 99.97 | translocation |
| JABTBS010000012.1 | 2688064 | 2700041 | tig00001084 | 21164   | 33134   | 11978 | 99.91 | translocation |
| MU089289.1        | 3151746 | 3163577 | tig00000050 | 11836   | 1       | 11832 | 99.25 | reversion     |
| JABTBS010000015.1 | 2120038 | 2131830 | tig00001083 | 96891   | 85099   | 11793 | 99.99 | reversion     |
| JABTBS010000015.1 | 1786151 | 1797860 | tig00001061 | 60751   | 49137   | 11710 | 95.53 | reversion     |
| MU089289.1        | 4018713 | 4030383 | tig00001053 | 1       | 11676   | 11671 | 99.7  | translocation |
| JABTBS010000015.1 | 878323  | 889937  | tig00001061 | 966461  | 954752  | 11615 | 95.53 | reversion     |
| JABTBS010000056.1 | 1       | 11610   | tig00001112 | 16139   | 4529    | 11610 | 99.97 | reversion     |
| JABTBS010000033.1 | 53311   | 64843   | tig00001049 | 362579  | 351055  | 11533 | 99.63 | reversion     |
| JABTBS010000012.1 | 2684815 | 2696233 | tig00001050 | 1048768 | 1037342 | 11419 | 99.76 | reversion     |
| MU089288.1        | 4006698 | 4018113 | tig00000254 | 6536    | 17950   | 11416 | 99.98 | translocation |
| JABTBS010000012.1 | 2618990 | 2630345 | tig00001052 | 73242   | 61889   | 11356 | 99.96 | reversion     |
| JABTBS010000012.1 | 2684880 | 2696233 | tig00001051 | 14589   | 3234    | 11354 | 99.96 | reversion     |
| JABTBS010000012.1 | 2712416 | 2723699 | tig00009047 | 11282   | 1       | 11284 | 98.25 | reversion     |
| JABTBS010000051.1 | 51088   | 62356   | tig00001112 | 4529    | 15795   | 11269 | 99.96 | translocation |
| JABTBS010000017.1 | 531943  | 543192  | tig00000123 | 24700   | 35967   | 11250 | 99.84 | translocation |
| MU089292.1        | 54295   | 65505   | tig00000319 | 211388  | 200119  | 11211 | 99.3  | reversion     |
| JABTBS010000041.1 | 84334   | 95518   | tig00000517 | 7915    | 19090   | 11185 | 99.92 | translocation |
| JABTBS010000042.1 | 33548   | 44732   | tig00000517 | 19090   | 7916    | 11185 | 99.89 | reversion     |
| JABTBS010000042.1 | 33549   | 44732   | tig00000020 | 20599   | 31759   | 11184 | 99.72 | translocation |
| JABTBS010000041.1 | 84334   | 95517   | tig00000020 | 31760   | 20599   | 11184 | 99.75 | reversion     |
| JABTBS010000045.1 | 10880   | 22063   | tig00000517 | 19090   | 7915    | 11184 | 99.91 | reversion     |
| JABTBS010000045.1 | 10881   | 22063   | tig00000020 | 20599   | 31760   | 11183 | 99.74 | translocation |
| MU089289.1        | 5023877 | 5035057 | tig00000517 | 7915    | 19090   | 11181 | 99.88 | translocation |
| MU089289.1        | 5023877 | 5035056 | tig00000020 | 31760   | 20599   | 11180 | 99.71 | reversion     |
| JABTBS010000006.1 | 1763152 | 1774331 | tig00000086 | 1354099 | 1342931 | 11180 | 99.47 | reversion     |
| JABTBS010000015.1 | 740502  | 751526  | tig00001083 | 3035    | 14051   | 11025 | 98.62 | translocation |
| JABTBS010000015.1 | 2039716 | 2050733 | tig00001059 | 12659   | 23683   | 11018 | 98.55 | translocation |
| MU089288.1        | 4007109 | 4018113 | tig00001075 | 1       | 11003   | 11005 | 99.94 | translocation |
| JABTBS010000015.1 | 2502140 | 2513129 | tig00001082 | 19456   | 30357   | 10990 | 91.41 | translocation |
| JABTBS010000015.1 | 2038594 | 2049501 | tig00001083 | 461304  | 472293  | 10908 | 91.28 | translocation |
| MU089292.1        | 54675   | 65505   | tig00000418 | 3       | 10906   | 10831 | 98.98 | translocation |
| MU089289.1        | 880648  | 891451  | tig00000079 | 154239  | 143435  | 10804 | 99.52 | reversion     |
| MU089294.1        | 63995   | 74785   | tig00009033 | 15064   | 4273    | 10791 | 99.99 | reversion     |
| MU089287.1        | 9543    | 20292   | tig00000260 | 273051  | 262360  | 10750 | 93.17 | reversion     |
| MU089293.1        | 103987  | 114736  | tig00009033 | 6210    | 16962   | 10750 | 99.97 | translocation |
| MU089289.1        | 2891278 | 2901903 | tig00001034 | 812097  | 822664  | 10626 | 95.67 | translocation |
| JABTBS010000012.1 | 3317533 | 3328153 | tig00001050 | 1034592 | 1045203 | 10621 | 99.89 | translocation |
| JABTBS010000012.1 | 3317533 | 3328153 | tig00001051 | 484     | 11096   | 10621 | 99.9  | translocation |
| MU089290.1        | 1332631 | 1343245 | tig00001083 | 851168  | 840533  | 10615 | 98.82 | reversion     |
| MU089290.1        | 169850  | 180463  | tig00000240 | 90622   | 80009   | 10614 | 100   | reversion     |
| JABTBS010000012.1 | 2616240 | 2626852 | tig00001052 | 675854  | 686472  | 10613 | 99.9  | translocation |
| MU089289.1        | 2382308 | 2392879 | tig00001025 | 188316  | 198882  | 10572 | 96.17 | translocation |
| MU089289.1        | 2343434 | 2354002 | tig00001025 | 75703   | 65078   | 10569 | 95.67 | reversion     |



|                   |         |         |             |         |         |       |       |               |
|-------------------|---------|---------|-------------|---------|---------|-------|-------|---------------|
| MU089289.1        | 2768163 | 2778729 | tig00001034 | 861541  | 850971  | 10567 | 96.18 | reversion     |
| JABTBS010000012.1 | 3044678 | 3055235 | tig00001057 | 732601  | 722069  | 10558 | 99.75 | reversion     |
| MU089291.1        | 269355  | 279900  | tig00001065 | 18073   | 7510    | 10546 | 99.71 | reversion     |
| JABTBS010000051.1 | 51819   | 62356   | tig00009033 | 17117   | 6583    | 10538 | 99.97 | reversion     |
| MU089289.1        | 2742806 | 2753331 | tig00000270 | 1154    | 11611   | 10526 | 93.45 | translocation |
| JABTBS010000012.1 | 4720684 | 4731205 | tig00001046 | 77904   | 67397   | 10522 | 99.05 | reversion     |
| MU089287.1        | 257751  | 268215  | tig00001092 | 566245  | 555806  | 10465 | 98.73 | reversion     |
| MU089287.1        | 138277  | 148716  | tig00001092 | 685741  | 675277  | 10440 | 98.73 | reversion     |
| JABTBS010000015.1 | 1307597 | 1317977 | tig00001087 | 1008311 | 1018708 | 10381 | 92.52 | translocation |
| MU089292.1        | 6372    | 16650   | tig00000319 | 211388  | 201134  | 10279 | 99.68 | reversion     |
| MU089289.1        | 2424960 | 2435237 | tig00001034 | 1130549 | 1140810 | 10278 | 96.68 | translocation |
| MU089289.1        | 2658314 | 2668576 | tig00001034 | 893623  | 903900  | 10263 | 96.69 | translocation |
| JABTBS010000015.1 | 3094352 | 3104593 | tig00001052 | 813076  | 823343  | 10242 | 99.75 | translocation |
| JABTBS010000012.1 | 4720684 | 4730871 | tig00001076 | 189047  | 178869  | 10188 | 98.97 | reversion     |
| JABTBS010000012.1 | 4720683 | 4730870 | tig00009038 | 516722  | 526897  | 10188 | 99.02 | translocation |
| JABTBS010000012.1 | 4720684 | 4730870 | tig00000162 | 234270  | 244446  | 10187 | 99.25 | translocation |
| JABTBS010000049.1 | 59382   | 69566   | tig00001087 | 998879  | 988728  | 10185 | 99.58 | reversion     |
| MU089288.1        | 4384819 | 4394996 | tig00000162 | 234270  | 244447  | 10178 | 99.53 | translocation |
| JABTBS010000012.1 | 1292149 | 1302326 | tig00001046 | 77905   | 67742   | 10178 | 99.47 | reversion     |
| MU089288.1        | 3475080 | 3485256 | tig00001046 | 77904   | 67743   | 10177 | 99.21 | reversion     |
| MU089288.1        | 4384819 | 4394995 | tig00001076 | 189047  | 178870  | 10177 | 99.83 | reversion     |
| MU089288.1        | 3475080 | 3485256 | tig00009038 | 516723  | 526897  | 10177 | 99.89 | translocation |
| MU089289.1        | 4020235 | 4030403 | tig00001053 | 1526    | 11676   | 10169 | 99.19 | translocation |
| JABTBS010000012.1 | 3751830 | 3761992 | tig00000162 | 234269  | 244447  | 10163 | 99.45 | translocation |
| JABTBS010000052.1 | 30663   | 40825   | tig00001023 | 433005  | 443137  | 10163 | 99.7  | translocation |
| MU089293.1        | 22833   | 32995   | tig00009033 | 11505   | 21639   | 10163 | 99.69 | translocation |
| MU089293.1        | 30692   | 40854   | tig00009033 | 11505   | 21639   | 10163 | 99.69 | translocation |
| MU089293.1        | 38551   | 48713   | tig00009033 | 11505   | 21639   | 10163 | 99.69 | translocation |
| MU089293.1        | 46410   | 56572   | tig00009033 | 11505   | 21639   | 10163 | 99.69 | translocation |
| MU089293.1        | 54269   | 64431   | tig00009033 | 11505   | 21639   | 10163 | 99.69 | translocation |
| MU089293.1        | 62128   | 72290   | tig00009033 | 11505   | 21639   | 10163 | 99.69 | translocation |
| MU089293.1        | 69987   | 80149   | tig00009033 | 11505   | 21639   | 10163 | 99.69 | translocation |
| MU089293.1        | 77846   | 88008   | tig00009033 | 11505   | 21639   | 10163 | 99.69 | translocation |
| MU089293.1        | 141455  | 151617  | tig00009033 | 21639   | 11505   | 10163 | 99.69 | reversion     |
| JABTBS010000012.1 | 3751831 | 3761991 | tig00001076 | 189047  | 178870  | 10161 | 99.17 | reversion     |
| JABTBS010000013.1 | 1534229 | 1544386 | tig00009036 | 438426  | 428299  | 10158 | 99.7  | reversion     |
| JABTBS010000012.1 | 2753403 | 2763554 | tig00001052 | 84266   | 94397   | 10152 | 99.34 | translocation |
| JABTBS010000039.1 | 42508   | 52658   | tig00000319 | 211307  | 201134  | 10151 | 99.74 | reversion     |
| JABTBS010000012.1 | 2753403 | 2763553 | tig00009047 | 18566   | 8436    | 10151 | 99.34 | reversion     |
| JABTBS010000006.1 | 5180468 | 5190614 | tig00001064 | 13060   | 23185   | 10147 | 99.24 | translocation |
| MU089289.1        | 1570295 | 1580438 | tig00001023 | 742325  | 732147  | 10144 | 98.96 | reversion     |
| JABTBS010000014.1 | 429384  | 439524  | tig00001038 | 230748  | 220628  | 10141 | 99.34 | reversion     |
| JABTBS010000012.1 | 1081480 | 1091618 | tig00000162 | 17843   | 27961   | 10139 | 99.8  | translocation |
| MU089288.1        | 181435  | 191563  | tig00001023 | 636728  | 626570  | 10129 | 99.7  | reversion     |

|                   |         |         |             |        |        |       |       |               |
|-------------------|---------|---------|-------------|--------|--------|-------|-------|---------------|
| JABTBS010000012.1 | 4133510 | 4143633 | tig00000109 | 14396  | 4303   | 10124 | 99.68 | reversion     |
| JABTBS010000014.1 | 687000  | 697119  | tig00001038 | 101147 | 90998  | 10120 | 99.7  | reversion     |
| JABTBS010000015.1 | 740502  | 750619  | tig00001082 | 20578  | 30690  | 10118 | 98.71 | translocation |
| MU089288.1        | 2692441 | 2702551 | tig00001083 | 962624 | 972683 | 10111 | 99.49 | translocation |
| JABTBS010000012.1 | 2583985 | 2594085 | tig00001057 | 631517 | 621417 | 10101 | 99.96 | reversion     |
| MU089286.1        | 10201   | 20276   | tig00000161 | 8829   | 18875  | 10076 | 99.47 | translocation |
| JABTBS010000015.1 | 3094352 | 3104423 | tig00001052 | 813076 | 823173 | 10072 | 99.74 | translocation |
| JABTBS010000012.1 | 3066742 | 3076779 | tig00001052 | 420018 | 430055 | 10038 | 99.99 | translocation |
| JABTBS010000012.1 | 3066742 | 3076779 | tig00001052 | 420018 | 430069 | 10038 | 99.85 | translocation |
| JABTBS010000015.1 | 704371  | 714408  | tig00001087 | 145942 | 135898 | 10038 | 95.23 | reversion     |
| MU089289.1        | 2306891 | 2316916 | tig00000270 | 234819 | 244822 | 10026 | 96.49 | translocation |
| MU089288.1        | 2761294 | 2771319 | tig00001078 | 38364  | 28338  | 10026 | 99.89 | reversion     |
| JABTBS010000018.1 | 1092253 | 1102257 | tig00001034 | 775556 | 785581 | 10005 | 96.47 | translocation |

**Table S2.** EF-1a sequences of 26 FOC1 isolates blast to NCBI

|            | Description                                                                                                     | per<br>ident | e-val<br>ue | accession      |
|------------|-----------------------------------------------------------------------------------------------------------------|--------------|-------------|----------------|
| FoYZ-<br>1 | Select seq MK172058.1 Fusarium oxysporum isolate FR3 translation elongation factor<br>1-alpha gene, partial cds | 99.61        | 0           | MK172058<br>.1 |
| FoYZ-<br>2 | Select seq MK172058.1 Fusarium oxysporum isolate FR3 translation elongation factor<br>1-alpha gene, partial cds | 99.72        | 0           | MK172058<br>.1 |
| FoYZ-<br>3 | Select seq MK172058.1 Fusarium oxysporum isolate FR3 translation elongation factor<br>1-alpha gene, partial cds | 99.86        | 0           | MK172058<br>.1 |
| FoYQ-<br>1 | Select seq MK172058.1 Fusarium oxysporum isolate FR3 translation elongation factor<br>1-alpha gene, partial cds | 99.72        | 0           | MK172058<br>.1 |
| FoYQ-<br>2 | Select seq MK172058.1 Fusarium oxysporum isolate FR3 translation elongation factor<br>1-alpha gene, partial cds | 99.61        | 0           | MK172058<br>.1 |
| FoXT-<br>1 | Select seq MK172058.1 Fusarium oxysporum isolate FR3 translation elongation factor<br>1-alpha gene, partial cds | 99.61        | 0           | MK172058<br>.1 |
| FoXT-<br>2 | Select seq MK172058.1 Fusarium oxysporum isolate FR3 translation elongation factor<br>1-alpha gene, partial cds | 99.72        | 0           | MK172058<br>.1 |
| FoXA-<br>1 | Select seq MK172058.1 Fusarium oxysporum isolate FR3 translation elongation factor<br>1-alpha gene, partial cds | 99.61        | 0           | MK172058<br>.1 |
| FoXA-<br>2 | Select seq MK172058.1 Fusarium oxysporum isolate FR3 translation elongation factor<br>1-alpha gene, partial cds | 99.61        | 0           | MK172058<br>.1 |
| FoWN<br>-1 | Select seq MK172058.1 Fusarium oxysporum isolate FR3 translation elongation factor<br>1-alpha gene, partial cds | 99.72        | 0           | MK172058<br>.1 |
| FoWN<br>-2 | Select seq MK172058.1 Fusarium oxysporum isolate FR3 translation elongation factor<br>1-alpha gene, partial cds | 99.61        | 0           | MK172058<br>.1 |
| FoTY-<br>1 | Select seq MK172058.1 Fusarium oxysporum isolate FR3 translation elongation factor<br>1-alpha gene, partial cds | 99.86        | 0           | MK172058<br>.1 |
| FoTY-<br>2 | Select seq MK172058.1 Fusarium oxysporum isolate FR3 translation elongation factor<br>1-alpha gene, partial cds | 99.61        | 0           | MK172058<br>.1 |
| FoTY-      | Select seq MK172058.1 Fusarium oxysporum isolate FR3 translation elongation factor                              | 99.61        | 0           |                |

|        |                           |                                |                               |       |   |  |  |  |          |
|--------|---------------------------|--------------------------------|-------------------------------|-------|---|--|--|--|----------|
| 3      | 1-alpha gene, partial cds |                                |                               |       |   |  |  |  | MK172058 |
|        |                           |                                |                               |       |   |  |  |  | .1       |
| FoJZ-1 | Select seq MK172058.1     | Fusarium oxysporum isolate FR3 | translation elongation factor | 99.86 | 0 |  |  |  | MK172058 |
|        | 1-alpha gene, partial cds |                                |                               |       |   |  |  |  | .1       |
| FoJZ-2 | Select seq MK172058.1     | Fusarium oxysporum isolate FR3 | translation elongation factor | 99.72 | 0 |  |  |  | MK172058 |
|        | 1-alpha gene, partial cds |                                |                               |       |   |  |  |  | .1       |
| FoHD-1 | Select seq MK172058.1     | Fusarium oxysporum isolate FR3 | translation elongation factor | 99.61 | 0 |  |  |  | MK172058 |
|        | 1-alpha gene, partial cds |                                |                               |       |   |  |  |  | .1       |
| FoHD-2 | Select seq MK172058.1     | Fusarium oxysporum isolate FR3 | translation elongation factor | 99.86 | 0 |  |  |  | MK172058 |
|        | 1-alpha gene, partial cds |                                |                               |       |   |  |  |  | .1       |
| FoDX-1 | Select seq MK172058.1     | Fusarium oxysporum isolate FR3 | translation elongation factor | 99.72 | 0 |  |  |  | MK172058 |
|        | 1-alpha gene, partial cds |                                |                               |       |   |  |  |  | .1       |
| FoDX-2 | Select seq MK172058.1     | Fusarium oxysporum isolate FR3 | translation elongation factor | 99.61 | 0 |  |  |  | MK172058 |
|        | 1-alpha gene, partial cds |                                |                               |       |   |  |  |  | .1       |
| FoDX-3 | Select seq MK172058.1     | Fusarium oxysporum isolate FR3 | translation elongation factor | 99.86 | 0 |  |  |  | MK172058 |
|        | 1-alpha gene, partial cds |                                |                               |       |   |  |  |  | .1       |
| FoCP-1 | Select seq MK172058.1     | Fusarium oxysporum isolate FR3 | translation elongation factor | 99.72 | 0 |  |  |  | MK172058 |
|        | 1-alpha gene, partial cds |                                |                               |       |   |  |  |  | .1       |
| FoCP-2 | Select seq MK172058.1     | Fusarium oxysporum isolate FR3 | translation elongation factor | 99.72 | 0 |  |  |  | MK172058 |
|        | 1-alpha gene, partial cds |                                |                               |       |   |  |  |  | .1       |
| FoBD-1 | Select seq MK172058.1     | Fusarium oxysporum isolate FR3 | translation elongation factor | 99.61 | 0 |  |  |  | MK172058 |
|        | 1-alpha gene, partial cds |                                |                               |       |   |  |  |  | .1       |
| FoBD-2 | Select seq MK172058.1     | Fusarium oxysporum isolate FR3 | translation elongation factor | 99.61 | 0 |  |  |  | MK172058 |
|        | 1-alpha gene, partial cds |                                |                               |       |   |  |  |  | .1       |
| FoBD-3 | Select seq MK172058.1     | Fusarium oxysporum isolate FR3 | translation elongation factor | 99.61 | 0 |  |  |  | MK172058 |
|        | 1-alpha gene, partial cds |                                |                               |       |   |  |  |  | .1       |

**Table S3.** ITS sequences of 26 FOC1 isolates blast to NCBI

|                | Description                                                                                                                                                                                       | per<br>iden<br>t | e-v<br>alu<br>e | access<br>ion      |
|----------------|---------------------------------------------------------------------------------------------------------------------------------------------------------------------------------------------------|------------------|-----------------|--------------------|
| FoY<br>Z-1     | Fusarium sp. P. del g internal transcribed spacer 1, partial sequence; 5.8S ribosomal RNA gene and internal transcribed spacer 2, complete sequence; and 28S ribosomal RNA gene, partial sequence | 99.5<br>9        | 0               | JX24<br>3754.<br>1 |
| FoY<br>Z-2     | Fusarium sp. P. del g internal transcribed spacer 1, partial sequence; 5.8S ribosomal RNA gene and internal transcribed spacer 2, complete sequence; and 29S ribosomal RNA gene, partial sequence | 98.7<br>7        | 0               | JX24<br>3754.<br>1 |
| FoY<br>Z-3     | Fusarium sp. P. del g internal transcribed spacer 1, partial sequence; 5.8S ribosomal RNA gene and internal transcribed spacer 2, complete sequence; and 30S ribosomal RNA gene, partial sequence | 99.5<br>9        | 0               | JX24<br>3754.<br>1 |
| FoY<br>Q-1     | Fusarium sp. P. del g internal transcribed spacer 1, partial sequence; 5.8S ribosomal RNA gene and internal transcribed spacer 2, complete sequence; and 31S ribosomal RNA gene, partial sequence | 98.7<br>7        | 0               | JX24<br>3754.<br>1 |
| FoY<br>Q-2     | Fusarium sp. P. del g internal transcribed spacer 1, partial sequence; 5.8S ribosomal RNA gene and internal transcribed spacer 2, complete sequence; and 32S ribosomal RNA gene, partial sequence | 98.7<br>7        | 0               | JX24<br>3754.<br>1 |
| FoX<br>T-1     | Fusarium sp. P. del g internal transcribed spacer 1, partial sequence; 5.8S ribosomal RNA gene and internal transcribed spacer 2, complete sequence; and 33S ribosomal RNA gene, partial sequence | 99.1<br>8        | 0               | JX24<br>3754.<br>1 |
| FoX<br>T-2     | Fusarium sp. P. del g internal transcribed spacer 1, partial sequence; 5.8S ribosomal RNA gene and internal transcribed spacer 2, complete sequence; and 34S ribosomal RNA gene, partial sequence | 99.1<br>8        | 0               | JX24<br>3754.<br>1 |
| FoX<br>A-1     | Fusarium sp. P. del g internal transcribed spacer 1, partial sequence; 5.8S ribosomal RNA gene and internal transcribed spacer 2, complete sequence; and 35S ribosomal RNA gene, partial sequence | 99.5<br>9        | 0               | JX24<br>3754.<br>1 |
| FoX<br>A-2     | Fusarium sp. P. del g internal transcribed spacer 1, partial sequence; 5.8S ribosomal RNA gene and internal transcribed spacer 2, complete sequence; and 36S ribosomal RNA gene, partial sequence | 98.7<br>7        | 0               | JX24<br>3754.<br>1 |
| Fo<br>WN<br>-1 | Fusarium sp. P. del g internal transcribed spacer 1, partial sequence; 5.8S ribosomal RNA gene and internal transcribed spacer 2, complete sequence; and 37S ribosomal RNA gene, partial sequence | 98.7<br>7        | 0               | JX24<br>3754.<br>1 |
| Fo<br>WN<br>-2 | Fusarium sp. P. del g internal transcribed spacer 1, partial sequence; 5.8S ribosomal RNA gene and internal transcribed spacer 2, complete sequence; and 38S ribosomal RNA gene, partial sequence | 99.1<br>8        | 0               | JX24<br>3754.<br>1 |
| FoT<br>Y-1     | Fusarium sp. P. del g internal transcribed spacer 1, partial sequence; 5.8S ribosomal RNA gene and internal transcribed spacer 2, complete sequence; and 39S ribosomal RNA gene, partial sequence | 98.7<br>7        | 0               | JX24<br>3754.<br>1 |
| FoT<br>Y-2     | Fusarium sp. P. del g internal transcribed spacer 1, partial sequence; 5.8S ribosomal RNA gene and internal transcribed spacer 2, complete sequence; and 40S ribosomal RNA gene, partial sequence | 99.5<br>9        | 0               | JX24<br>3754.      |

|     |                                                                                                    |      |   |       |  |   |
|-----|----------------------------------------------------------------------------------------------------|------|---|-------|--|---|
|     |                                                                                                    |      |   |       |  | 1 |
| FoT | Fusarium sp. P. del g internal transcribed spacer 1, partial sequence; 5.8S ribosomal RNA gene and | 99.1 | 0 | JX24  |  |   |
| Y-3 | internal transcribed spacer 2, complete sequence; and 41S ribosomal RNA gene, partial sequence     | 8    |   | 3754. |  |   |
|     |                                                                                                    |      |   |       |  | 1 |
| FoJ | Fusarium sp. P. del g internal transcribed spacer 1, partial sequence; 5.8S ribosomal RNA gene and | 99.5 | 0 | JX24  |  |   |
| Z-1 | internal transcribed spacer 2, complete sequence; and 42S ribosomal RNA gene, partial sequence     | 9    |   | 3754. |  |   |
|     |                                                                                                    |      |   |       |  | 1 |
| FoJ | Fusarium sp. P. del g internal transcribed spacer 1, partial sequence; 5.8S ribosomal RNA gene and | 99.5 | 0 | JX24  |  |   |
| Z-2 | internal transcribed spacer 2, complete sequence; and 43S ribosomal RNA gene, partial sequence     | 9    |   | 3754. |  |   |
|     |                                                                                                    |      |   |       |  | 1 |
| FoH | Fusarium sp. P. del g internal transcribed spacer 1, partial sequence; 5.8S ribosomal RNA gene and | 98.7 | 0 | JX24  |  |   |
| D-1 | internal transcribed spacer 2, complete sequence; and 44S ribosomal RNA gene, partial sequence     | 7    |   | 3754. |  |   |
|     |                                                                                                    |      |   |       |  | 1 |
| FoH | Fusarium sp. P. del g internal transcribed spacer 1, partial sequence; 5.8S ribosomal RNA gene and | 99.1 | 0 | JX24  |  |   |
| D-2 | internal transcribed spacer 2, complete sequence; and 45S ribosomal RNA gene, partial sequence     | 8    |   | 3754. |  |   |
|     |                                                                                                    |      |   |       |  | 1 |
| FoD | Fusarium sp. P. del g internal transcribed spacer 1, partial sequence; 5.8S ribosomal RNA gene and | 98.7 | 0 | JX24  |  |   |
| X-1 | internal transcribed spacer 2, complete sequence; and 46S ribosomal RNA gene, partial sequence     | 7    |   | 3754. |  |   |
|     |                                                                                                    |      |   |       |  | 1 |
| FoD | Fusarium sp. P. del g internal transcribed spacer 1, partial sequence; 5.8S ribosomal RNA gene and | 98.7 | 0 | JX24  |  |   |
| X-2 | internal transcribed spacer 2, complete sequence; and 47S ribosomal RNA gene, partial sequence     | 7    |   | 3754. |  |   |
|     |                                                                                                    |      |   |       |  | 1 |
| FoD | Fusarium sp. P. del g internal transcribed spacer 1, partial sequence; 5.8S ribosomal RNA gene and | 99.1 | 0 | JX24  |  |   |
| X-3 | internal transcribed spacer 2, complete sequence; and 48S ribosomal RNA gene, partial sequence     | 8    |   | 3754. |  |   |
|     |                                                                                                    |      |   |       |  | 1 |
| FoC | Fusarium sp. P. del g internal transcribed spacer 1, partial sequence; 5.8S ribosomal RNA gene and | 99.1 | 0 | JX24  |  |   |
| P-1 | internal transcribed spacer 2, complete sequence; and 49S ribosomal RNA gene, partial sequence     | 8    |   | 3754. |  |   |
|     |                                                                                                    |      |   |       |  | 1 |
| FoC | Fusarium sp. P. del g internal transcribed spacer 1, partial sequence; 5.8S ribosomal RNA gene and | 98.7 | 0 | JX24  |  |   |
| P-2 | internal transcribed spacer 2, complete sequence; and 50S ribosomal RNA gene, partial sequence     | 7    |   | 3754. |  |   |
|     |                                                                                                    |      |   |       |  | 1 |
| FoB | Fusarium sp. P. del g internal transcribed spacer 1, partial sequence; 5.8S ribosomal RNA gene and | 99.1 | 0 | JX24  |  |   |
| D-1 | internal transcribed spacer 2, complete sequence; and 51S ribosomal RNA gene, partial sequence     | 8    |   | 3754. |  |   |
|     |                                                                                                    |      |   |       |  | 1 |
| FoB | Fusarium sp. P. del g internal transcribed spacer 1, partial sequence; 5.8S ribosomal RNA gene and | 99.5 | 0 | JX24  |  |   |
| D-2 | internal transcribed spacer 2, complete sequence; and 52S ribosomal RNA gene, partial sequence     | 9    |   | 3754. |  |   |
|     |                                                                                                    |      |   |       |  | 1 |
| FoB | Fusarium sp. P. del g internal transcribed spacer 1, partial sequence; 5.8S ribosomal RNA gene and | 99.5 | 0 | JX24  |  |   |
| D-3 | internal transcribed spacer 2, complete sequence; and 53S ribosomal RNA gene, partial sequence     | 9    |   | 3754. |  |   |
|     |                                                                                                    |      |   |       |  | 1 |

**Table S4.** the sequence of FOC-specific DNA fragment

| id      | sequence                                              |
|---------|-------------------------------------------------------|
| tig0000 | AATTTGCTGTGATAGGTGGATTTACGGCGCAATATCGGAAAAGAGGTTAAATG |
| 9029_5  | CAAATTCTGCATCGTCAGCTGCGGCGGTAGTGGACGCCATGAGGGTGACGAA  |
| 48994_  | GAAAAGGCGAAAGCCCACGGTGGACTTCATATCGTTGAACAACATGGTTTGA  |
| 549339  | AAACTAATATTGAGAACTGATTTGGATAGAAAAGAGGTTCCATGGAAAACC   |
| _+      | AGGAGTGGCTTATGACAGCTTTTGTGATAATACAAAATCCCCCAGACCCCAA  |
|         | CCGGTACCCATGTTACTTATCACCTCCATGTCTTAACTAAAAAGTGCAGCAC  |
|         | TCTAACACCGAAACCCCTTGTCACCTATCATTGA                    |
